# Supplementary material for: Unpacking trust: The Italian validation of the Epistemic Trust, Mistrust, and Credulity Questionnaire (ETMCQ)
Source: PubMed Central journal article supplement (PMC9879475; doi:10.1371/journal.pone.0280328), 2023-01-26
Supplement: pone.0280328.s001.pdf [file pone.0280328.s001.pdf]

|                                                                                                                         | Non vero |   |   |   |   |   |   | Molto vero |  |
|-------------------------------------------------------------------------------------------------------------------------|----------|---|---|---|---|---|---|------------|--|
| 1. Quando ho un problema personale di solito chiedo consiglio agli altri                                                | 1        | 2 | 3 | 4 | 5 | 6 | 7 |            |  |
| 2. Trovo più facile credere alle informazioni che provengono da chi mi conosce bene                                     | 1        | 2 | 3 | 4 | 5 | 6 | 7 |            |  |
| 3. Preferisco andare a cercarmi da solo le cose su internet piuttosto che chiedere informazioni alle altre persone      | 1        | 2 | 3 | 4 | 5 | 6 | 7 |            |  |
| 4. Spesso mi sembra che gli altri non capiscano cosa voglio o di cosa ho bisogno                                        | 1        | 2 | 3 | 4 | 5 | 6 | 7 |            |  |
| 5. Vengo spesso considerato ingenuo/a perché credo a quasi tutto quello che la gente mi dice                            | 1        | 2 | 3 | 4 | 5 | 6 | 7 |            |  |
| 6. Quando parlo con varie persone mi faccio convincere da ciò che dicono, anche se prima credevo cose diverse           | 1        | 2 | 3 | 4 | 5 | 6 | 7 |            |  |
| 7. A volte parlare con persone che mi conoscono da tanto tempo mi aiuta ad acquisire un punto di vista diverso su di me | 1        | 2 | 3 | 4 | 5 | 6 | 7 |            |  |
| 8. Trovo utile imparare da quello che gli altri mi raccontano a proposito delle loro esperienze                         | 1        | 2 | 3 | 4 | 5 | 6 | 7 |            |  |
| 9. Se ti fidi troppo di quello che la gente ti dice, finisci per rimanere ferito                                        | 1        | 2 | 3 | 4 | 5 | 6 | 7 |            |  |
| 10. Quando qualcuno mi dice qualcosa la mia prima reazione è chiedermi perché me la sta dicendo                         | 1        | 2 | 3 | 4 | 5 | 6 | 7 |            |  |
| 11. Mi è capitato troppo spesso di seguire i consigli delle persone sbagliate                                           | 1        | 2 | 3 | 4 | 5 | 6 | 7 |            |  |
| 12. Le persone mi dicono che sono troppo facilmente influenzabile                                                       | 1        | 2 | 3 | 4 | 5 | 6 | 7 |            |  |
| 13. Se non so cosa fare, il mio primo impulso è chiedere a qualcuno della cui opinione mi fido                          | 1        | 2 | 3 | 4 | 5 | 6 | 7 |            |  |
| 14. Di solito non metto in pratica i consigli degli altri, anche quando penso che probabilmente sono validi             | 1        | 2 | 3 | 4 | 5 | 6 | 7 |            |  |
| 15. In passato, ho creduto alle persone sbagliate e gli altri si sono approfittati di me.                               | 1        | 2 | 3 | 4 | 5 | 6 | 7 |            |  |

This was the original version administered to participants.

Note: Item 11 was excluded from the scoring.
